# Supplementary material for: The Association of Hypertensive Disorders of Pregnancy with Infant Mortality, Preterm Delivery, and Small for Gestational Age
Source: MDPI journal article supplement (doi:10.3390/healthcare12050597), 2024-03-06
Supplement: s1 [file s1]

Supplemental Table S2. Sensitivity analysis of the change in risk estimates for infant outcomes when data is limited to adults aged 20 and over.

|                                                  | Full dataset |             |             | Limited to adults (20+ years) |             |             |          |
|--------------------------------------------------|--------------|-------------|-------------|-------------------------------|-------------|-------------|----------|
|                                                  | n            | RR (95% CI) |             | n                             | RR (95% CI) |             | % change |
| Infant Mortality                                 |              |             |             |                               |             |             |          |
| Neither pre-pregnancy hypertension nor HDP       | 2,035        | referent    |             | 1,680                         | referent    |             |          |
| Pre-pregnancy hypertension                       | 73           | 1.48        | (1.16-1.88) | 69                            | 1.49        | (1.16-1.92) | 0.8%     |
| HDP                                              | 273          | 1.39        | (1.21-1.58) | 233                           | 1.44        | (1.25-1.67) | 4.1%     |
| Pre-pregnancy hypertension with superimposed HDP | 45           | 1.79        | (1.31-2.43) | 42                            | 1.77        | (1.28-2.43) | -1.1%    |
| Preterm delivery (<37 weeks)                     |              |             |             |                               |             |             |          |
| Non-Hispanic White                               |              |             |             |                               |             |             |          |
| Neither pre-pregnancy hypertension nor HDP       | 23,865       | referent    |             | 21,280                        | referent    |             |          |
| Pre-pregnancy hypertension                       | 1,077        | 3.22        | (3.00-3.46) | 1,010                         | 3.14        | (3.00-3.46) | -2.5%    |
| HDP                                              | 5,180        | 3.09        | (2.98-3.20) | 4,689                         | 3.16        | (2.98-3.20) | 2.4%     |
| Pre-pregnancy hypertension with superimposed HDP | 510          | 3.07        | (2.78-3.40) | 485                           | 3.01        | (2.78-3.40) | -2.2%    |
| Non-Hispanic Black                               |              |             |             |                               |             |             |          |
| Neither pre-pregnancy hypertension nor HDP       | 18,743       | referent    |             | 15,684                        | referent    |             |          |
| Pre-pregnancy hypertension                       | 1,518        | 2.95        | (2.77-3.15) | 1,451                         | 2.97        | (2.79-3.18) | 0.8%     |
| HDP                                              | 4,995        | 2.89        | (2.79-3.00) | 4,273                         | 2.98        | (2.86-3.11) | 3.2%     |
| Pre-pregnancy hypertension with superimposed HDP | 987          | 3.53        | (3.26-3.82) | 934                           | 3.53        | (3.25-3.83) | 0.1%     |
| Hispanic                                         |              |             |             |                               |             |             |          |
| Neither pre-pregnancy hypertension nor HDP       | 3,553        | referent    |             | 3,112                         | referent    |             |          |
| Pre-pregnancy hypertension                       | 105          | 3.82        | (3.04-4.80) | 98                            | 3.66        | (2.89-4.62) | -4.3%    |
| HDP                                              | 591          | 3.75        | (3.39-4.16) | 532                           | 3.91        | (3.51-4.35) | 4.0%     |
| Pre-pregnancy hypertension with superimposed HDP | 60           | 5.19        | (3.80-7.08) | 55                            | 4.86        | (3.52-6.72) | -6.2%    |
| Other                                            |              |             |             |                               |             |             |          |
| Neither pre-pregnancy hypertension nor HDP       | 882          | referent    |             | 835                           | referent    |             |          |
| Pre-pregnancy hypertension                       | 22           | 2.98        | (1.75-5.08) | 22                            | 3.10        | (1.84-5.22) | 4.1%     |
| HDP                                              | 116          | 2.94        | (2.34-3.69) | 114                           | 3.18        | (2.53-3.99) | 8.3%     |
| Pre-pregnancy hypertension with superimposed HDP | 14           | 2.78        | (1.48-5.22) | 14                            | 2.90        | (1.54-5.47) | 4.5%     |
| Early preterm delivery (28 to <34 weeks)         |              |             |             |                               |             |             |          |
| Non-Hispanic White                               |              |             |             |                               |             |             |          |
| Neither pre-pregnancy hypertension nor HDP       | 4,619        | referent    |             | 3,983                         | referent    |             |          |
| Pre-pregnancy hypertension                       | 355          | 4.95        | (4.40-5.57) | 330                           | 4.90        | (4.34-5.53) | -1.0%    |
| HDP                                              | 1,339        | 3.56        | (3.34-3.80) | 1,208                         | 3.74        | (3.49-4.00) | 4.9%     |
| Pre-pregnancy hypertension with superimposed HDP | 164          | 4.46        | (3.78-5.28) | 152                           | 4.29        | (3.60-5.10) | -4.0%    |
| Non-Hispanic Black                               |              |             |             |                               |             |             |          |
| Neither pre-pregnancy hypertension nor HDP       | 5,443        | referent    |             | 4,540                         | referent    |             |          |
| Pre-pregnancy hypertension                       | 597          | 3.48        | (3.16-3.82) | 571                           | 3.53        | (3.21-3.89) | 1.7%     |

|                                                   |        |      |              |        |      |              |       |
|---------------------------------------------------|--------|------|--------------|--------|------|--------------|-------|
| HDP                                               | 1,831  | 3.06 | (2.89-3.24)  | 1,610  | 3.22 | (3.03-3.43)  | 5.4%  |
| Pre-pregnancy hypertension with superimposed HDP  | 380    | 3.69 | (3.28-4.14)  | 360    | 3.66 | (3.25-4.13)  | -0.7% |
| <b>Hispanic</b>                                   |        |      |              |        |      |              |       |
| Neither pre-pregnancy hypertension nor HDP        | 735    |      | referent     | 632    |      | referent     |       |
| Pre-pregnancy hypertension                        | 34     | 5.33 | (3.69-7.70)  | 32     | 5.06 | (3.46-7.40)  | -5.1% |
| HDP                                               | 165    | 4.28 | (3.56-5.15)  | 151    | 4.48 | (3.70-5.43)  | 4.8%  |
| Pre-pregnancy hypertension with superimposed HDP  | 23     | 7.73 | (4.86-12.31) | 21     | 6.97 | (4.28-11.33) | -9.9% |
| <b>Other</b>                                      |        |      |              |        |      |              |       |
| Neither pre-pregnancy hypertension nor HDP        | 185    |      | referent     | 170    |      | referent     |       |
| Pre-pregnancy hypertension                        | 5      | 2.72 | (0.95-7.74)  | 5      | 2.75 | (0.97-7.80)  | 1.1%  |
| HDP                                               | 27     | 2.97 | (1.91-4.64)  | 26     | 3.08 | (1.96-4.85)  | 3.6%  |
| Pre-pregnancy hypertension with superimposed HDP  | 6      | 4.97 | (1.87-13.18) | 6      | 5.35 | (2.01-14.21) | 7.6%  |
| <b>Late preterm delivery (34 to &lt;37 weeks)</b> |        |      |              |        |      |              |       |
| <b>Non-Hispanic White</b>                         |        |      |              |        |      |              |       |
| Neither pre-pregnancy hypertension nor HDP        | 19,246 |      | referent     | 17,297 |      | referent     |       |
| Pre-pregnancy hypertension                        | 722    | 2.64 | (2.43-2.87)  | 680    | 2.60 | (2.39-2.83)  | -1.4% |
| HDP                                               | 3,841  | 2.86 | (2.75-2.98)  | 3,481  | 2.92 | (2.80-3.04)  | 2.1%  |
| Pre-pregnancy hypertension with superimposed HDP  | 346    | 2.61 | (2.32-2.94)  | 333    | 2.59 | (2.30-2.92)  | -0.9% |
| <b>Non-Hispanic Black</b>                         |        |      |              |        |      |              |       |
| Neither pre-pregnancy hypertension nor HDP        | 13,300 |      | referent     | 11,144 |      | referent     |       |
| Pre-pregnancy hypertension                        | 921    | 2.50 | (2.32-2.71)  | 880    | 2.54 | (2.35-2.75)  | 1.6%  |
| HDP                                               | 3,164  | 2.65 | (2.53-2.76)  | 2,663  | 2.68 | (2.55-2.81)  | 1.4%  |
| Pre-pregnancy hypertension with superimposed HDP  | 604    | 3.15 | (2.86-3.46)  | 574    | 3.16 | (2.86-3.48)  | 0.2%  |
| <b>Hispanic</b>                                   |        |      |              |        |      |              |       |
| Neither pre-pregnancy hypertension nor HDP        | 2,818  |      | referent     | 2,480  |      | referent     |       |
| Pre-pregnancy hypertension                        | 71     | 3.21 | (2.46-4.19)  | 66     | 3.08 | (2.34-4.06)  | -4.1% |
| HDP                                               | 426    | 3.45 | (3.07-3.88)  | 381    | 3.57 | (3.16-4.04)  | 3.5%  |
| Pre-pregnancy hypertension with superimposed HDP  | 37     | 4.10 | (2.83-5.95)  | 34     | 3.91 | (2.66-5.76)  | -4.7% |
| <b>Other</b>                                      |        |      |              |        |      |              |       |
| Neither pre-pregnancy hypertension nor HDP        | 697    |      | referent     | 665    |      | referent     |       |
| Pre-pregnancy hypertension                        | 17     | 2.94 | (1.63-5.31)  | 17     | 3.09 | (1.74-5.48)  | 5.0%  |
| HDP                                               | 89     | 2.82 | (2.19-3.63)  | 88     | 3.08 | (2.40-3.97)  | 9.5%  |
| Pre-pregnancy hypertension with superimposed HDP  | 8      | 2.07 | (0.96-4.47)  | 8      | 2.15 | (1.00-4.66)  | 3.9%  |
| <b>Small for gestational age</b>                  |        |      |              |        |      |              |       |
| <b>Non-Hispanic White</b>                         |        |      |              |        |      |              |       |
| Neither pre-pregnancy hypertension nor HDP        | 25,374 |      | referent     | 22,057 |      | referent     |       |
| Pre-pregnancy hypertension                        | 549    | 1.69 | (1.54-1.86)  | 520    | 1.75 | (1.59-1.93)  | 3.6%  |
| HDP                                               | 3,076  | 1.64 | (1.57-1.71)  | 2,685  | 1.69 | (1.62-1.77)  | 3.2%  |

|                                                  |        |      |             |        |      |             |        |
|--------------------------------------------------|--------|------|-------------|--------|------|-------------|--------|
| Pre-pregnancy hypertension with superimposed HDP | 316    | 1.93 | (1.70-2.18) | 304    | 2.03 | (1.79-2.30) | 5.6%   |
| <b>Non-Hispanic Black</b>                        |        |      |             |        |      |             |        |
| Neither pre-pregnancy hypertension nor HDP       | 29,420 |      | referent    | 23,298 |      | referent    |        |
| Pre-pregnancy hypertension                       | 1,039  | 1.39 | (1.29-1.49) | 972    | 1.40 | (1.30-1.51) | 0.9%   |
| HDP                                              | 4,442  | 1.45 | (1.40-1.50) | 3,540  | 1.47 | (1.41-1.53) | 1.6%   |
| Pre-pregnancy hypertension with superimposed HDP | 652    | 1.41 | (1.29-1.54) | 603    | 1.43 | (1.30-1.56) | 1.2%   |
| <b>Hispanic</b>                                  |        |      |             |        |      |             |        |
| Neither pre-pregnancy hypertension nor HDP       | 4,360  |      | referent    | 3,636  |      | referent    |        |
| Pre-pregnancy hypertension                       | 62     | 2.08 | (1.57-2.76) | 57     | 2.22 | (1.67-2.95) | 6.6%   |
| HDP                                              | 420    | 2.13 | (1.90-2.39) | 357    | 2.22 | (1.97-2.51) | 4.2%   |
| Pre-pregnancy hypertension with superimposed HDP | 25     | 1.74 | (1.12-2.72) | 20     | 1.48 | (0.89-2.44) | -15.1% |
| <b>Other</b>                                     |        |      |             |        |      |             |        |
| Neither pre-pregnancy hypertension nor HDP       | 1,419  |      | referent    | 1,353  |      | referent    |        |
| Pre-pregnancy hypertension                       | 17     | 2.03 | (1.15-3.58) | 17     | 1.89 | (1.07-3.34) | -6.6%  |
| HDP                                              | 119    | 2.13 | (1.70-2.66) | 113    | 2.12 | (1.69-2.65) | -0.5%  |
| Pre-pregnancy hypertension with superimposed HDP | 11     | 2.20 | (1.13-4.29) | 10     | 1.98 | (0.99-3.97) | -9.8%  |
