# Supplementary material for: The Association of Hypertensive Disorders of Pregnancy with Infant Mortality, Preterm Delivery, and Small for Gestational Age
Source: MDPI journal article supplement (doi:10.3390/healthcare12050597), 2024-03-06
Supplement: s1 [file s1]

Supplemental Table S3. Summary of main study findings

|                                                  | n      | RR (95% CI)       | p for interaction of case/race |
|--------------------------------------------------|--------|-------------------|--------------------------------|
| Infant Mortality                                 |        |                   |                                |
| Neither pre-pregnancy hypertension nor HDP       | 2,035  | referent          | 0.62                           |
| Pre-pregnancy hypertension                       | 73     | 1.48 (1.16-1.88)  |                                |
| HDP                                              | 273    | 1.39 (1.21-1.58)  |                                |
| Pre-pregnancy hypertension with superimposed HDP | 45     | 1.79 (1.31-2.43)  |                                |
| Preterm delivery (<37 weeks)                     |        |                   | <0.001                         |
| Non-Hispanic White                               |        |                   |                                |
| Neither pre-pregnancy hypertension nor HDP       | 23,865 | referent          |                                |
| Pre-pregnancy hypertension                       | 1,077  | 3.22 (3.00-3.46)  |                                |
| HDP                                              | 5,180  | 3.09 (2.98-3.20)  |                                |
| Pre-pregnancy hypertension with superimposed HDP | 510    | 3.07 (2.78-3.40)  |                                |
| Non-Hispanic Black                               |        |                   |                                |
| Neither pre-pregnancy hypertension nor HDP       | 18,743 | 1.52 (1.49-1.56)  |                                |
| Pre-pregnancy hypertension                       | 1,518  | 4.39 (4.12-4.68)  |                                |
| HDP                                              | 4,995  | 4.31 (4.15-4.47)  |                                |
| Pre-pregnancy hypertension with superimposed HDP | 987    | 5.25 (4.86-5.68)  |                                |
| Hispanic                                         |        |                   |                                |
| Neither pre-pregnancy hypertension nor HDP       | 3,553  | 0.81 (0.77-0.84)  |                                |
| Pre-pregnancy hypertension                       | 105    | 3.19 (2.55-4.00)  |                                |
| HDP                                              | 591    | 3.14 (2.85-3.46)  |                                |
| Pre-pregnancy hypertension with superimposed HDP | 60     | 4.49 (3.30-6.12)  |                                |
| Other                                            |        |                   |                                |
| Neither pre-pregnancy hypertension nor HDP       | 882    | 1.01 (0.94-1.09)  |                                |
| Pre-pregnancy hypertension                       | 22     | 3.36 (1.99-5.67)  |                                |
| HDP                                              | 116    | 3.22 (2.61-3.97)  |                                |
| Pre-pregnancy hypertension with superimposed HDP | 14     | 3.29 (1.77-6.11)  |                                |
| Early preterm delivery (28 to <34 weeks)         |        |                   | <0.001                         |
| Non-Hispanic White                               |        |                   |                                |
| Neither pre-pregnancy hypertension nor HDP       | 4,619  |                   |                                |
| Pre-pregnancy hypertension                       | 355    | 4.95 (4.40-5.57)  |                                |
| HDP                                              | 1,339  | 3.56 (3.34-3.80)  |                                |
| Pre-pregnancy hypertension with superimposed HDP | 164    | 4.46 (3.78-5.28)  |                                |
| Non-Hispanic Black                               |        |                   |                                |
| Neither pre-pregnancy hypertension nor HDP       | 5,443  | 2.32 (2.22-2.43)  |                                |
| Pre-pregnancy hypertension                       | 597    | 7.97 (7.23-8.78)  |                                |
| HDP                                              | 1,831  | 7.06 (6.64-7.51)  |                                |
| Pre-pregnancy hypertension with superimposed HDP | 380    | 8.73 (7.77-9.81)  |                                |
| Hispanic                                         |        |                   |                                |
| Neither pre-pregnancy hypertension nor HDP       | 735    | 0.80 (0.73-0.87)  |                                |
| Pre-pregnancy hypertension                       | 34     | 4.56 (3.19-6.52)  |                                |
| HDP                                              | 165    | 3.62 (3.05-4.29)  |                                |
| Pre-pregnancy hypertension with superimposed HDP | 23     | 6.93 (4.42-10.89) |                                |
| Other                                            |        |                   |                                |

|                                                   |        |      |              |
|---------------------------------------------------|--------|------|--------------|
| Neither pre-pregnancy hypertension nor HDP        | 185    | 1.05 | (0.90-1.22)  |
| Pre-pregnancy hypertension                        | 5      | 3.20 | (1.16-8.78)  |
| HDP                                               | 27     | 3.14 | (2.10-4.70)  |
| Pre-pregnancy hypertension with superimposed HDP  | 6      | 5.32 | (2.11-13.41) |
| <b>Late preterm delivery (34 to &lt;37 weeks)</b> |        |      | <0.001       |
| <b>Non-Hispanic White</b>                         |        |      |              |
| Neither pre-pregnancy hypertension nor HDP        | 19,246 |      | referent     |
| Pre-pregnancy hypertension                        | 722    | 2.64 | (2.43-2.87)  |
| HDP                                               | 3,841  | 2.86 | (2.75-2.98)  |
| Pre-pregnancy hypertension with superimposed HDP  | 346    | 2.61 | (2.32-2.94)  |
| <b>Non-Hispanic Black</b>                         |        |      |              |
| Neither pre-pregnancy hypertension nor HDP        | 13,300 | 1.32 | (1.29-1.36)  |
| Pre-pregnancy hypertension                        | 921    | 3.25 | (3.01-3.51)  |
| HDP                                               | 3,164  | 3.38 | (3.24-3.54)  |
| Pre-pregnancy hypertension with superimposed HDP  | 604    | 3.96 | (3.61-4.36)  |
| <b>Hispanic</b>                                   |        |      |              |
| Neither pre-pregnancy hypertension nor HDP        | 2,818  | 0.82 | (0.78-0.86)  |
| Pre-pregnancy hypertension                        | 71     | 2.67 | (2.05-3.48)  |
| HDP                                               | 426    | 2.90 | (2.60-3.24)  |
| Pre-pregnancy hypertension with superimposed HDP  | 37     | 3.53 | (2.44-5.11)  |
| <b>Other</b>                                      |        |      |              |
| Neither pre-pregnancy hypertension nor HDP        | 697    | 1.00 | (0.92-1.09)  |
| Pre-pregnancy hypertension                        | 17     | 3.25 | (1.82-5.81)  |
| HDP                                               | 89     | 3.13 | (2.48-3.96)  |
| Pre-pregnancy hypertension with superimposed HDP  | 8      | 2.53 | (1.19-5.37)  |
| <b>Small for gestational age</b>                  |        |      | <0.001       |
| <b>Non-Hispanic White</b>                         |        |      |              |
| Neither pre-pregnancy hypertension nor HDP        | 25,374 |      | referent     |
| Pre-pregnancy hypertension                        | 549    | 1.68 | (1.53-1.84)  |
| HDP                                               | 3,076  | 1.62 | (1.55-1.69)  |
| Pre-pregnancy hypertension with superimposed HDP  | 316    | 1.92 | (1.69-2.16)  |
| <b>Non-Hispanic Black</b>                         |        |      |              |
| Neither pre-pregnancy hypertension nor HDP        | 29,420 | 2.50 | (2.45-2.55)  |
| Pre-pregnancy hypertension                        | 1,039  | 3.51 | (3.27-3.77)  |
| HDP                                               | 4,442  | 3.64 | (3.50-3.78)  |
| Pre-pregnancy hypertension with superimposed HDP  | 652    | 3.56 | (3.25-3.89)  |
| <b>Hispanic</b>                                   |        |      |              |
| Neither pre-pregnancy hypertension nor HDP        | 4,360  | 1.07 | (1.03-1.11)  |
| Pre-pregnancy hypertension                        | 62     | 2.07 | (1.57-2.73)  |
| HDP                                               | 420    | 2.25 | (2.01-2.50)  |
| Pre-pregnancy hypertension with superimposed HDP  | 25     | 1.74 | (1.12-2.72)  |
| <b>Other</b>                                      |        |      |              |
| Neither pre-pregnancy hypertension nor HDP        | 1,419  | 1.67 | (1.57-1.77)  |
| Pre-pregnancy hypertension                        | 17     | 3.10 | (1.77-5.44)  |
| HDP                                               | 119    | 3.41 | (2.76-4.21)  |
| Pre-pregnancy hypertension with superimposed HDP  | 11     | 3.19 | (1.65-6.18)  |
