# Supplementary material for: The Association of Hypertensive Disorders of Pregnancy with Infant Mortality, Preterm Delivery, and Small for Gestational Age
Source: MDPI journal article supplement (doi:10.3390/healthcare12050597), 2024-03-06
Supplement: s1 [file s1]

**Supplemental Table S1.** Diagnoses for the exposure, covariates, and outcomes of interest based on hospitalization and emergency department encounters coded using the International Classification of Diseases, Ninth and Tenth Revision, Clinical Modification (ICD-9-CM) and (ICD-10-CM) codes or as reported on birth certificates or death certificates

| <b>DIAGNOSIS</b>                                                                                                                                                                                                                                                                                                                                                                                                                                                        | <b>ICD-9-CM CODE</b>                    | <b>ICD-10-CM CODE</b>              |
|-------------------------------------------------------------------------------------------------------------------------------------------------------------------------------------------------------------------------------------------------------------------------------------------------------------------------------------------------------------------------------------------------------------------------------------------------------------------------|-----------------------------------------|------------------------------------|
| Outcome of delivery (birth) *                                                                                                                                                                                                                                                                                                                                                                                                                                           | V27.x, V30.x, 640-649, 650-659, 660-669 | Z37.x                              |
| Single liveborn; single live birth *                                                                                                                                                                                                                                                                                                                                                                                                                                    | V27.0, V30.0                            | Z37.0                              |
| Kidney transplant                                                                                                                                                                                                                                                                                                                                                                                                                                                       | procedure code: 55.6, V42.0             | Z94.0                              |
| <b>Hypertensive disorders of pregnancy (HDP)</b>                                                                                                                                                                                                                                                                                                                                                                                                                        |                                         |                                    |
| Gestational hypertension, Pre-eclampsia, Eclampsia, Pre-existing hypertension with pre-eclampsia                                                                                                                                                                                                                                                                                                                                                                        | 642.3, 642.4-642.5, 642.6, 642.7        | O11.x, O13.x, O14.x, O15.x, O.16.x |
| Gestational hypertension (birth certificate)                                                                                                                                                                                                                                                                                                                                                                                                                            | --                                      | --                                 |
| <b>Pre-pregnancy hypertension</b>                                                                                                                                                                                                                                                                                                                                                                                                                                       |                                         |                                    |
| Benign essential hypertension complicating pregnancy, childbirth, and the puerperium; Hypertension secondary to renal disease complicating pregnancy, childbirth, and the puerperium; Other pre-existing hypertension complicating pregnancy, childbirth, and the puerperium; Pre-existing essential hypertension complicating pregnancy, childbirth, and the puerperium, Pre-existing hypertensive heart disease complicating pregnancy, childbirth and the puerperium | 642.0-642.2                             | O10.0                              |
| Pre-pregnancy hypertension (birth certificate)                                                                                                                                                                                                                                                                                                                                                                                                                          | --                                      | --                                 |
| <b>Pre-pregnancy hypertension with superimposed HDP †</b>                                                                                                                                                                                                                                                                                                                                                                                                               |                                         |                                    |
| Pre-eclampsia or eclampsia superimposed on pre-existing hypertension; Pre-existing hypertension with pre-eclampsia                                                                                                                                                                                                                                                                                                                                                      | 642.7                                   | O11.x, O13.x, O14.x, O15.x         |

\* Obtained from the mother's hospitalization/emergency department visit record.

† Also defined by a combination of the above diagnosis codes for hypertensive disorder of pregnancy and pre-pregnancy hypertension.
